# Supplementary material for: Diverse proteins aggregate in mild cognitive impairment and Alzheimer’s disease brain
Source: PubMed Central journal article supplement (PMC7305608; doi:10.1186/s13195-020-00641-2), 2020-06-19

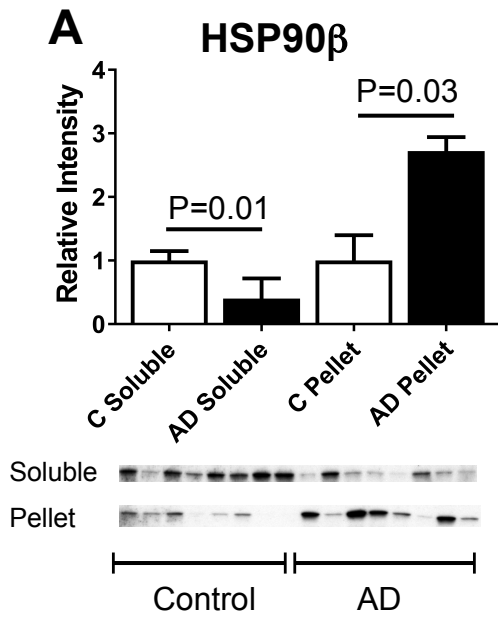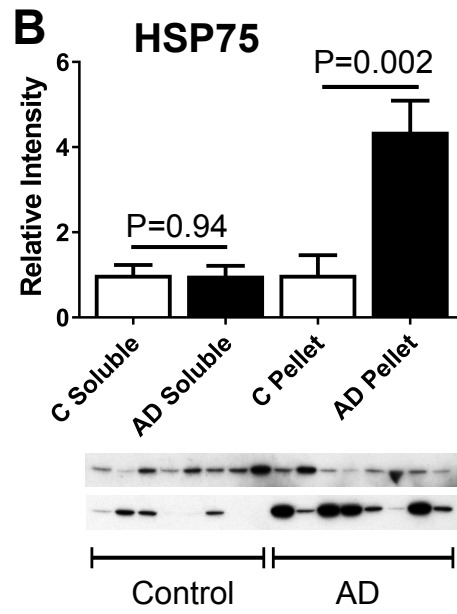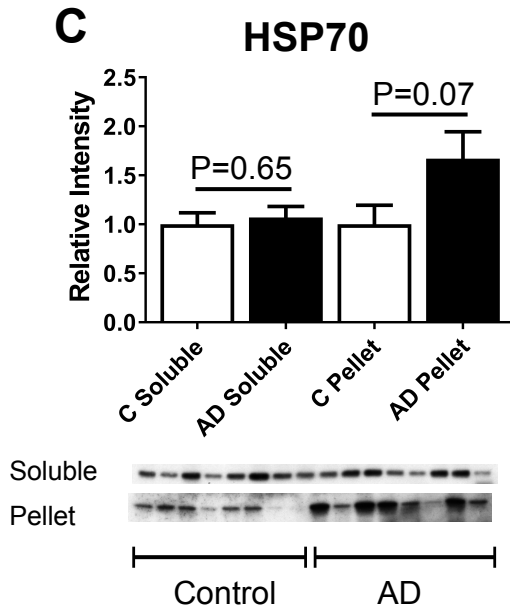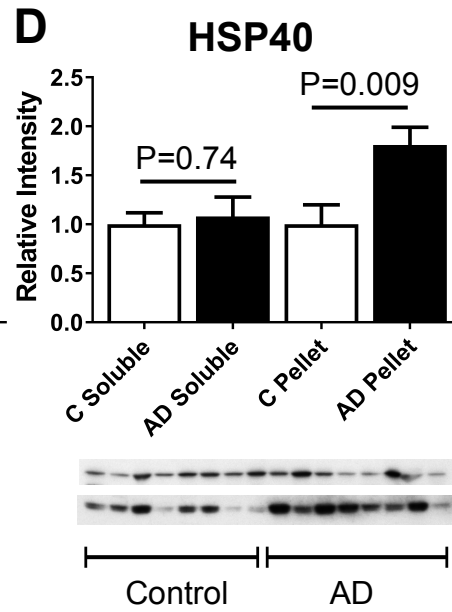

Supplement: 13195_2020_641_MOESM6_ESM.pdf [file 13195_2020_641_MOESM6_ESM.pdf]
